# Supplementary material for: Safety and efficacy of a new micronized formulation of the ALIAmide palmitoylglucosamine in preclinical models of inflammation and osteoarthritis pain
Source: PubMed Central journal article supplement (PMC6883534; doi:10.1186/s13075-019-2048-y), 2019-11-28
Supplement: 13075_2019_2048_MOESM1_ESM.pdf [file 13075_2019_2048_MOESM1_ESM.pdf]

Vehicle

m-PGA

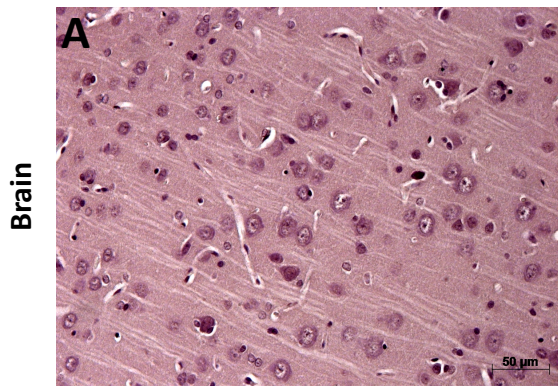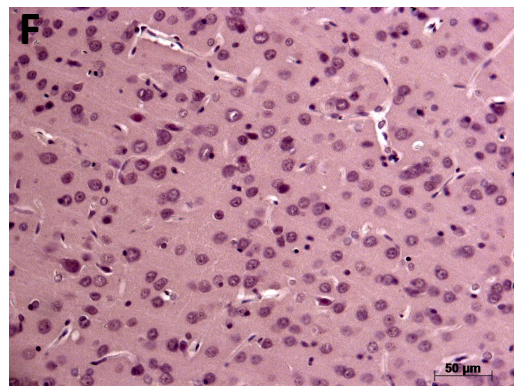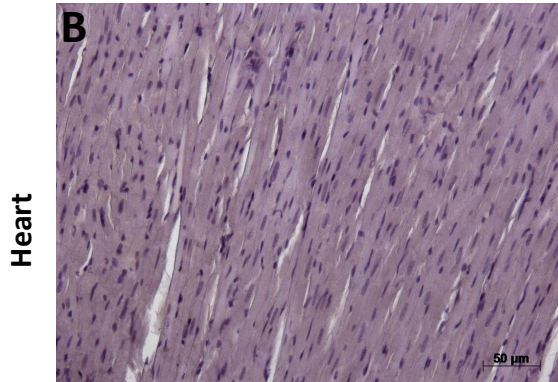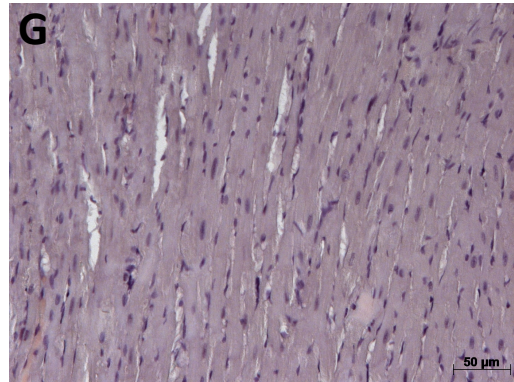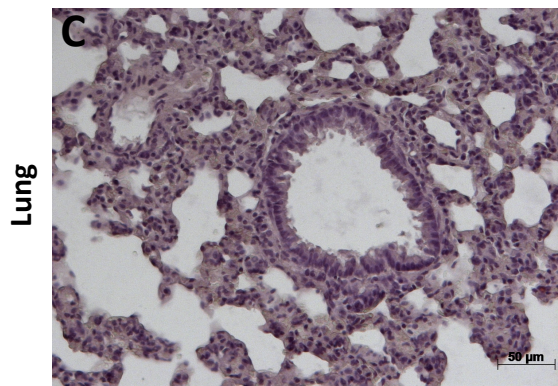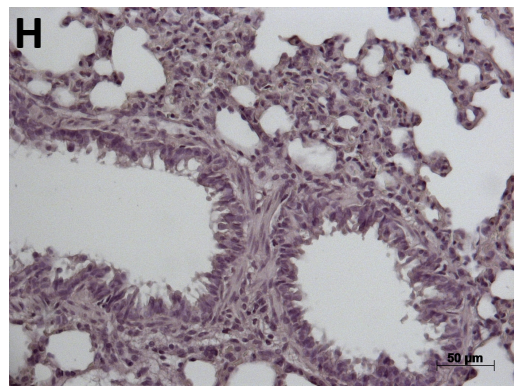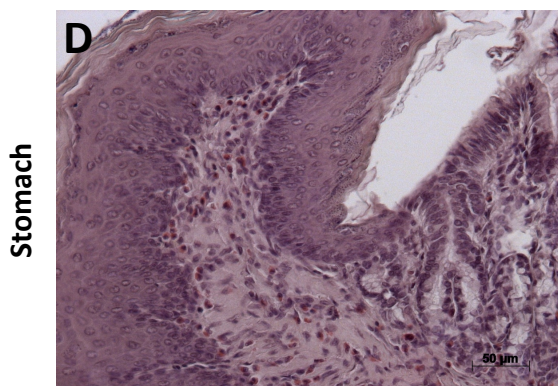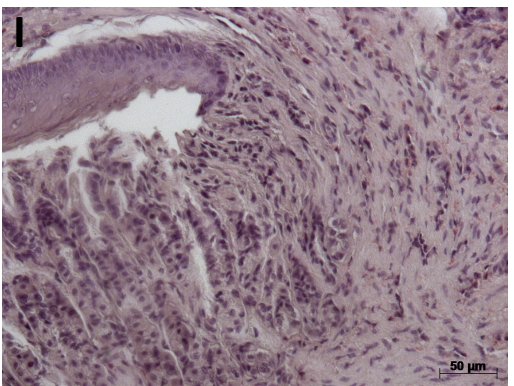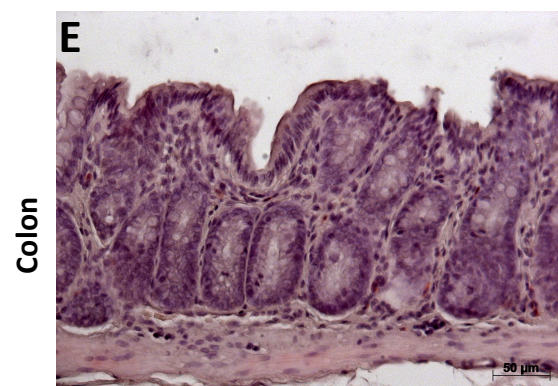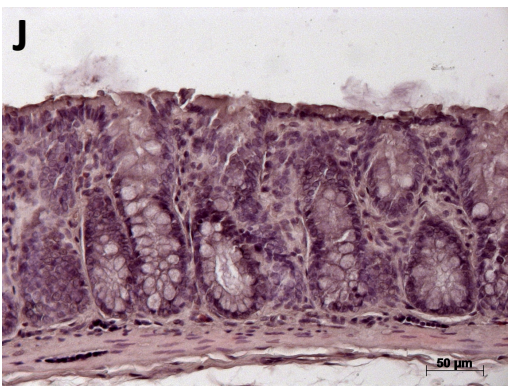

Supplementary Figure 1
